# Supplementary material
Source: Springer Nature journal article supplement (https://www.springermedizin.de/resource/supplementary/13012_2011_402_MOESM6_ESM.pdf/9629950)

Identification

Screening

Eligibility

Included

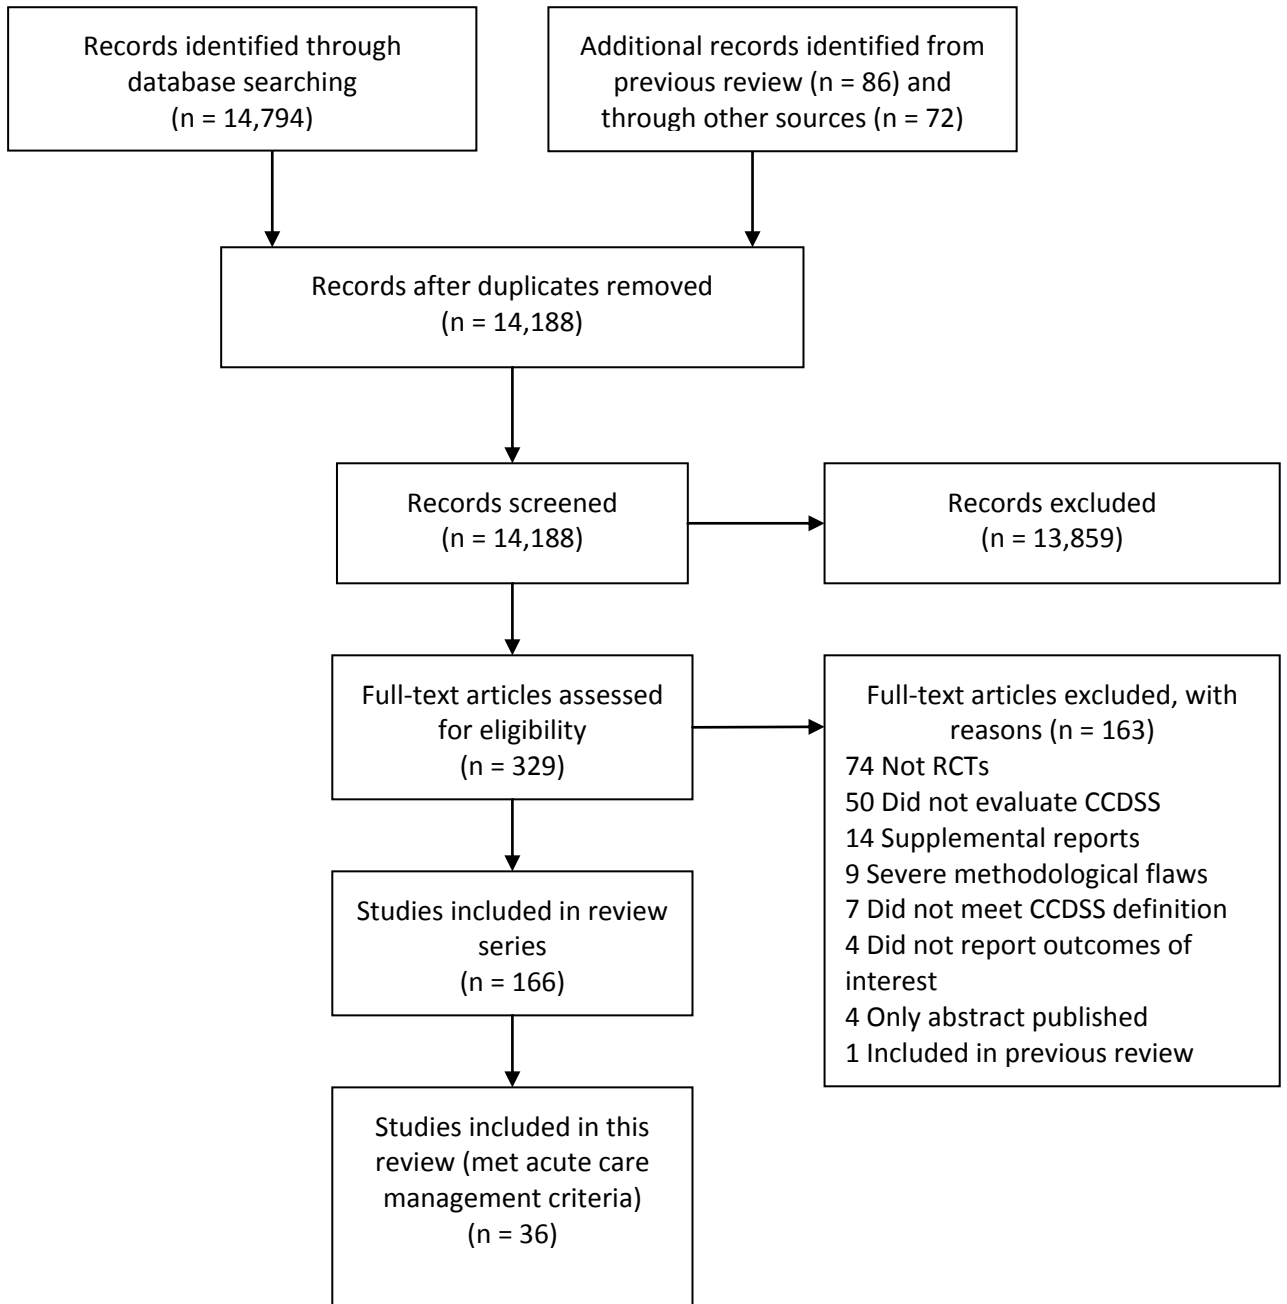

Supplement: MOESM6 [file 9629950]
